# Supplementary material
Source: MDPI journal article supplement (https://www.mdpi.com/2227-9717/12/1/233)
Supplement: s1 [file s1]

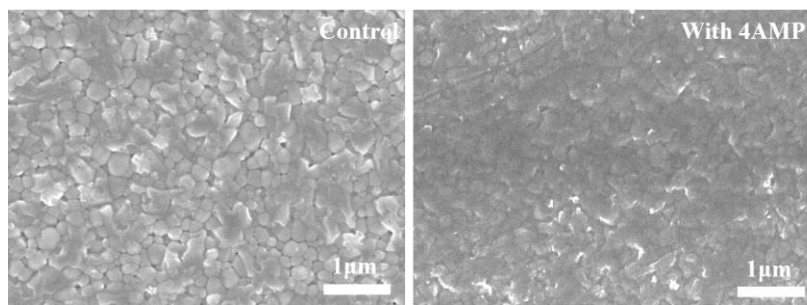

**Figure S1.** Top SEM images of the perovskite film treated with and without 4AMP.

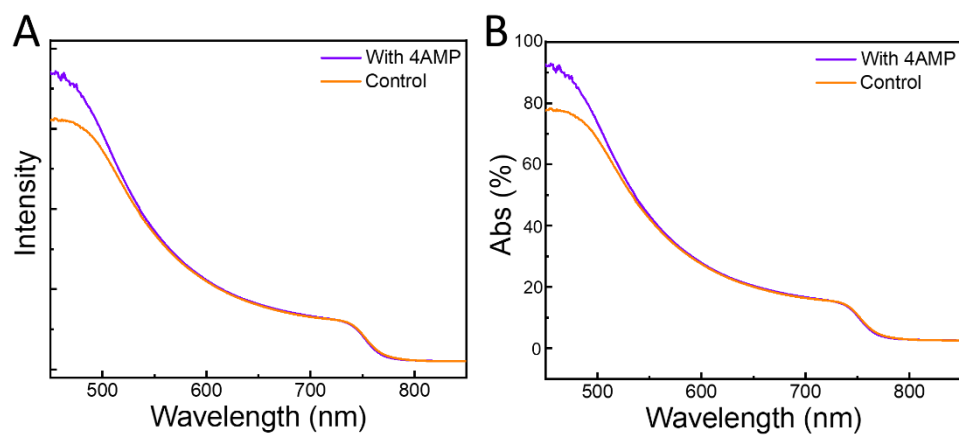

**Figure S2.** UV absorbance spectra of the perovskite film treated with and without 4AMP.

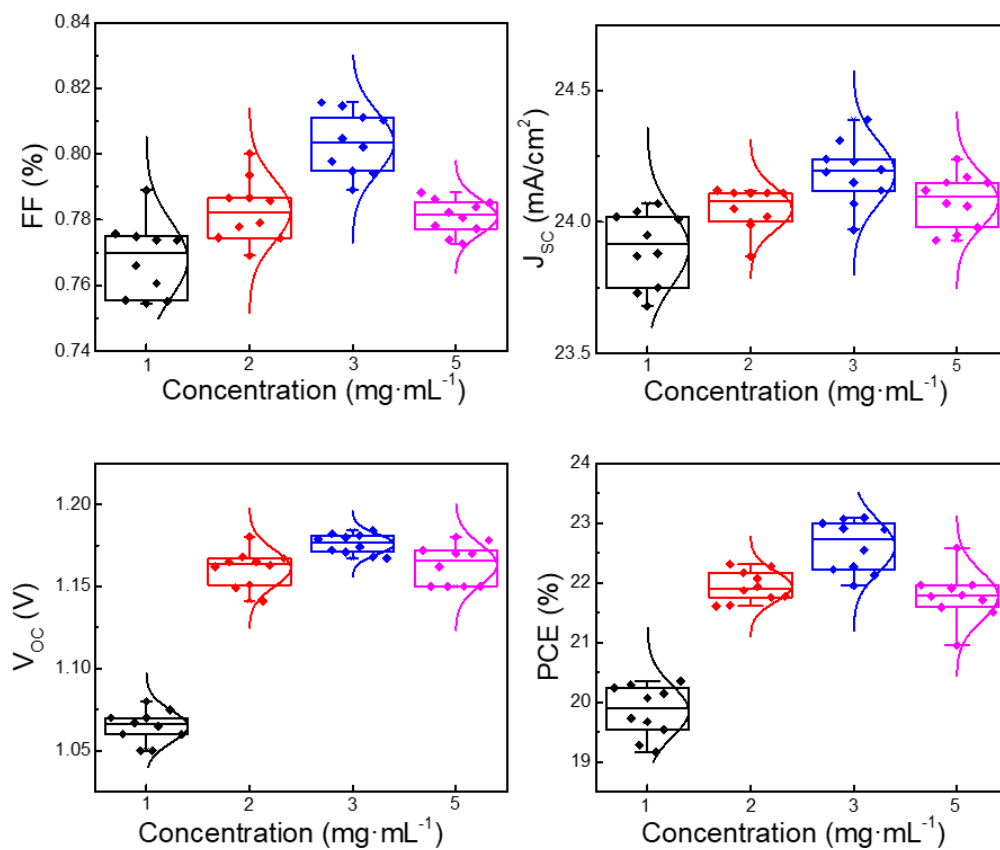

**Figure S3.** Statistical analysis for 10 individual cells of the effect of different concentration on the  $FF$ ,  $J_{sc}$ ,  $V_{oc}$ , and  $PCE$ .

## Supporting Information

---

**Table S1.** The summary of TRPL curve analysis : short and long lifetime contributions and electron lifetimes.

---

|               | $A_1$ (%) | $\tau_1$ (ns) | $A_2$ (%) | $\tau_2$ (ns) | $T_{ave}$ (ns) |
|---------------|-----------|---------------|-----------|---------------|----------------|
| Modified film | 52.79     | 5.12          | 47.21     | 152.48        | 147.15         |
| Control film  | 43.85     | 8.37          | 56.15     | 161.12        | 153.83         |

---
